# Supplementary material for: Quality of life in cancer patients undergoing anticoagulant treatment with LMWH for venous thromboembolism: the QUAVITEC study on behalf of the Groupe Francophone Thrombose et Cancer (GFTC)
Source: PubMed Central journal article supplement (PMC6007467; doi:10.18632/oncotarget.25454), 2018-06-05
Supplement: oncotarget-09-26990-s001.pdf [file oncotarget-09-26990-s001.pdf]

## Quality of life in cancer patients undergoing anticoagulant treatment with LMWH for venous thromboembolism: the QUAHITEC study on behalf of the Groupe Francophone Thrombose et Cancer (GFTC)

### SUPPLEMENTARY MATERIALS

**Supplementary Table 1: Baseline patient characteristics at time of VTE diagnosis for participants receiving LMWH –Primary cancer site**

| Primary Cancer site         | LMWH<br>N (%) |
|-----------------------------|---------------|
| Breast                      | 54 (15.2)     |
| Lung                        | 45 (12.7)     |
| Colon                       | 35 (9.9)      |
| Ovary                       | 25 (7.0)      |
| Pancreas                    | 24 (6.8)      |
| Non-Hodgkin's lymphoma      | 22 (6.2)      |
| Rectum                      | 13 (3.7)      |
| Myeloma                     | 13 (3.7)      |
| Prostate                    | 12 (3.4)      |
| Bladder                     | 12 (3.4)      |
| Stomach                     | 11 (3.1)      |
| Melanoma                    | 10 (2.8)      |
| Testicle                    | 9 (2.5)       |
| Oral, Head and neck         | 9 (2.5)       |
| Cervix/endometrium          | 7 (2.0)       |
| Brain                       | 6 (1.7)       |
| Kidney                      | 6 (1.7)       |
| Acute lymphocytic leukemia  | 6 (1.7)       |
| Hodgkin's lymphoma          | 5 (1.4)       |
| Sarcoma                     | 3 (0.9)       |
| Esophagus                   | 3 (0.9)       |
| Acute myelogenous leukemia  | 2 (0.6)       |
| Liver                       | 2 (0.6)       |
| Carcinoma of unknown origin | 2 (0.6)       |
| Other                       | 19 (5.4)      |

**Supplementary Table 2: Differences QoL scores between baseline and 3- or 6-month follow-ups**

|                               | <i>N</i> | <b>M3-M0</b> | <i>N</i> | <b>M6-M0</b> |
|-------------------------------|----------|--------------|----------|--------------|
| <b>MOS SF-36</b>              |          | Mean (SD)    |          | Mean (SD)    |
| Global HRQoL                  | 252      | 2.9 (19)     | 181      | 7.6 (22)     |
| Physical Health summary score | 252      | 2.7 (20)     | 181      | 7.7 (23)     |
| Mental Health summary score   | 252      | 3.1 (22)     | 181      | 7.6 (24)     |
| Physical functioning          | 252      | 0.42 (28)    | 181      | 4.9 (31)     |
| Physical roles limitation     | 252      | 6.2 (39)     | 181      | 15 (45)      |
| Bodily pain                   | 252      | 3.7 (31)     | 181      | 8 (36)       |
| General health                | 252      | 0.53 (9.8)   | 181      | 3.1 (11)     |
| Vitality                      | 252      | 2.4 (23)     | 181      | 8.9 (23)     |
| Social functioning            | 252      | 4.2 (29)     | 181      | 6.7 (32)     |
| Emotional functioning         | 252      | 2.6 (44)     | 181      | 9.4 (52)     |
| Mental health                 | 252      | 3.2 (20)     | 181      | 5.5 (21)     |
| <b>EORTC QLQ-30</b>           |          |              |          |              |
| Global health status /QOL     | 249      | 6.6 (26)     | 176      | 11 (29)      |
| Physical functioning          | 245      | 0.96 (24)    | 174      | 3.2 (27)     |
| Role functioning              | 240      | 3.8 (40)     | 172      | 10 (40)      |
| Emotional functioning         | 249      | 4.2 (24)     | 179      | 9.2 (27)     |
| Cognitive functioning         | 249      | 2.8 (25)     | 178      | 3.9 (25)     |
| Social functioning            | 247      | 3.8 (33)     | 178      | 11 (37)      |
| Fatigue                       | 241      | -5.8 (30)    | 170      | -14 (34)     |
| Nausea and vomiting           | 243      | -0.89 (29)   | 173      | -6.2 (30)    |
| Pain                          | 248      | -6 (34)      | 180      | -9 (38)      |
| Dyspnea                       | 239      | -3.5 (34)    | 171      | -11 (34)     |
| Insomnia                      | 237      | -8 (37)      | 169      | -13 (41)     |
| Appetite loss                 | 241      | -7.1 (41)    | 172      | -13 (41)     |
| Constipation                  | 245      | -6.3 (31)    | 177      | -7 (35)      |
| Diarrhea                      | 246      | -1.2 (35)    | 176      | -5.1 (36)    |
| Financial difficulties        | 245      | -1.5 (21)    | 175      | -3.2 (19)    |
| <b>VEINES-QOL</b>             |          |              |          |              |
| VEINES-QOL                    | 235      | -1.4 (9.2)   | 165      | -1.4 (10)    |
| VEINES-Sym                    | 237      | -0.77 (10)   | 164      | -0.23 (11)   |

**Supplementary Table 3: Impact of cancer, VTE, and individual patient characteristics on changes in MOS SF-36 HRQoL (A) and EORTC QLQ-C30 (B) scores in participants treated with LMWH**

**A**

| VARIABLES               | MOS SF-36 HRQoL               |      |       |                      |             |      |       |                                                                                             |      |       |
|-------------------------|-------------------------------|------|-------|----------------------|-------------|------|-------|---------------------------------------------------------------------------------------------|------|-------|
|                         | Change rate per month (slope) |      |       | Variable of interest |             |      |       | Interaction between time and Variable of interest (change in the slope due to the variable) |      |       |
|                         | Estim.                        | SE   | P     | Value                | Estim.      | SE   | P     | Estim.                                                                                      | SE   | P     |
| ECOG                    | 1.02                          | 0.31 | 0.001 | -0,1<br>(2,3,4)      | 1<br>-13.63 |      |       | 1<br>0.69                                                                                   |      |       |
| Dissemination           | 2.33                          | 0.63 | <.001 | Local                | 1           |      |       | 1                                                                                           |      | *     |
|                         |                               |      |       | Regional             | 3.46        | 3.58 | 0.335 | -1.27                                                                                       | 0.83 | 0.128 |
|                         |                               |      |       | Metastatic           | 4.32        | 3.1  | 0.165 | -1.72                                                                                       | 0.73 | 0.019 |
| Histology               | 0.81                          | 0.32 | 0.012 | Adenocar.            | 1           |      |       | 1                                                                                           |      | **    |
|                         |                               |      |       | Squamous             | -4.89       | 4.79 | 0.308 | 0.82                                                                                        | 1.14 | 0.474 |
|                         |                               |      |       | Neuroendoc.          | -14.11      | 8.86 | 0.112 | 2.48                                                                                        | 2.24 | 0.268 |
|                         |                               |      |       | Sarcoma              | -4.39       | 9.87 | 0.657 | 0.73                                                                                        | 2.39 | 0.759 |
|                         |                               |      |       | Other                | -0.08       | 2.36 | 0.974 | 1.33                                                                                        | 0.56 | 0.017 |
| Cancer surgery          | 1.2                           | 0.27 | <.001 | No                   | 1           |      |       | 1                                                                                           |      |       |
|                         |                               |      |       | Yes                  | 0.02        | 3.44 | 0.996 | 1.04                                                                                        | 0.86 | 0.226 |
| Tyrosine Kinases        | 1.34                          | 0.26 | <.001 | No                   | 1           |      |       | 1                                                                                           |      |       |
|                         |                               |      |       | Yes                  | 6.74        | 6.99 | 0.336 | -2                                                                                          | 1.83 | 0.276 |
| Chemotherapy            | 1.14                          | 0.41 | 0.006 | No                   | 1           |      |       | 1                                                                                           |      |       |
|                         |                               |      |       | Yes                  | -1.98       | 2.21 | 0.369 | 0.24                                                                                        | 0.52 | 0.64  |
| Anti-angiogenics        | 1.36                          | 0.26 | <.001 | No                   | 1           |      |       | 1                                                                                           |      |       |
|                         |                               |      |       | Yes                  | 11.48       | 4.55 | 0.012 | -0.99                                                                                       | 1.04 | 0.34  |
| Previous DVT            | 0.4                           | 1.36 | 0.77  | No                   | 1           |      |       | 1                                                                                           |      |       |
|                         |                               |      |       | Yes                  | -3.63       | 3.11 | 0.244 | 0.5                                                                                         | 0.72 | 0.491 |
| Previous PE             | -3.02                         | 2.57 | 0.24  | No                   | 1           |      |       | 1                                                                                           |      |       |
|                         |                               |      |       | Yes                  | -9.86       | 6.19 | 0.112 | 2.21                                                                                        | 1.3  | 0.09  |
| Obesity (BMI > 35kg/m2) | -0.08                         | 2.82 | 0.977 | No                   | 1           |      |       | 1                                                                                           |      |       |
|                         |                               |      |       | Yes                  | -7.78       | 5.98 | 0.194 | 0.7                                                                                         | 1.43 | 0.625 |
| Acute Infection         | 4.92                          | 1.95 | 0.012 | No                   | 1           |      |       | 1                                                                                           |      |       |
|                         |                               |      |       | Yes                  | 9.73        | 3.89 | 0.013 | -1.85                                                                                       | 1    | 0.066 |
| Bedridden               | 4.76                          | 1.44 | 0.001 | No                   | 1           |      |       | 1                                                                                           |      |       |
|                         |                               |      |       | Yes                  | 12.31       | 2.92 | <.001 | -1.84                                                                                       | 0.76 | 0.016 |
| Central venous catheter | 0.12                          | 0.78 | 0.873 | No                   | 1           |      |       | 1                                                                                           |      |       |
|                         |                               |      |       | Yes                  | -4.59       | 2.14 | 0.032 | 0.8                                                                                         | 0.52 | 0.122 |
| Symptomatic VTE         | -0.45                         | 0.49 | 0.361 | No                   | 1           |      |       | 1                                                                                           |      |       |
|                         |                               |      |       | Yes                  | -7.67       | 2.39 | 0.001 | 2.36                                                                                        | 0.57 | <.001 |
| Superficial VTE         | 1.2                           | 0.26 | <.001 | No                   | 1           |      |       | 1                                                                                           |      |       |
|                         |                               |      |       | Yes                  | 4.05        | 4.61 | 0.381 | 1.6                                                                                         | 1.02 | 0.118 |
| Deep VTE                | 0.66                          | 0.47 | 0.162 | No                   | 1           |      |       | 1                                                                                           |      |       |
|                         |                               |      |       | Yes                  | -5.53       | 2.28 | 0.016 | 0.89                                                                                        | 0.56 | 0.109 |
| Bilateral VTE           | 1.33                          | 0.26 | <.001 | No                   | 1           |      |       | 1                                                                                           |      |       |
|                         |                               |      |       | Yes                  | -8.57       | 4.51 | 0.058 | -0.73                                                                                       | 1.2  | 0.544 |
| Pulmonary embolism      | 1.52                          | 0.3  | <.001 | No                   | 1           |      |       | 1                                                                                           |      |       |
|                         |                               |      |       | Yes                  | 2.3         | 2.2  | 0.296 | -0.7                                                                                        | 0.54 | 0.192 |
| CVC-related thrombosis  | 1.32                          | 0.26 | <.001 | No                   | 1           |      |       | 1                                                                                           |      |       |
|                         |                               |      |       | Yes                  | 6.86        | 3.78 | 0.071 | -0.18                                                                                       | 0.98 | 0.856 |

\*P.value of the global likelihood ratio interaction test : 0.022.

\*\*P.value of the global likelihood ratio interaction test : 0.001.

B

| VARIABLES                  | EORTC QLQ-C30                 |      |       |                      |             |       |       |                                                                                             |      |       |
|----------------------------|-------------------------------|------|-------|----------------------|-------------|-------|-------|---------------------------------------------------------------------------------------------|------|-------|
|                            | Change rate per month (slope) |      |       | Variable of interest |             |       |       | Interaction between time and Variable of interest (change in the slope due to the variable) |      |       |
|                            | Estim.                        | SE   | P     | Value                | Estim.      | SE    | P     | Estim.                                                                                      | SE   | P     |
| ECOG                       | 1.58                          | 0.39 | <.001 | -0,1<br>(2,3,4)      | 1<br>-15.08 |       |       | 1<br>1.71                                                                                   |      |       |
| Dissemination              | 3.09                          | 0.81 | <.001 | Local                | 1           |       |       | 1                                                                                           |      | 0.011 |
|                            |                               |      |       | Regional             | 2.27        | 4.24  | 0.593 | -0.77                                                                                       | 1.06 | 0.466 |
|                            |                               |      |       | Metastatic           | 2.14        | 3.65  | 0.559 | -1.59                                                                                       | 0.93 | 0.089 |
| Histology                  | 1.98                          | 0.41 | <.001 | Adenocar.            | 1           |       |       | 1                                                                                           |      | ***   |
|                            |                               |      |       | Squamous             | -2.17       | 5.67  | 0.703 | -0.56                                                                                       | 1.47 | 0.702 |
|                            |                               |      |       | Neuroendoc.          | -15.81      | 10.5  | 0.133 | 1.34                                                                                        | 2.86 | 0.639 |
|                            |                               |      |       | Sarcoma              | -2.5        | 11.69 | 0.831 | 0.2                                                                                         | 3.05 | 0.947 |
|                            |                               |      |       | Other                | 2.09        | 2.81  | 0.458 | 0.95                                                                                        | 0.71 | 0.182 |
| Cancer surgery             | 2.2                           | 0.34 | <.001 | No                   | 1           |       |       | 1                                                                                           |      |       |
|                            |                               |      |       | Yes                  | 3.18        | 4.09  | 0.437 | 0.64                                                                                        | 1.09 | 0.559 |
| Tyrosine Kinases           | 2.17                          | 0.32 | <.001 | No                   | 1           |       |       | 1                                                                                           |      |       |
|                            |                               |      |       | Yes                  | -8.81       | 8.31  | 0.29  | 4.2                                                                                         | 2.3  | 0.068 |
| Chemotherapy               | 2.07                          | 0.52 | <.001 | No                   | 1           |       |       | 1                                                                                           |      |       |
|                            |                               |      |       | Yes                  | -2.1        | 2.63  | 0.425 | 0.27                                                                                        | 0.66 | 0.679 |
| Anti-angiogenics           | 2.42                          | 0.33 | <.001 | No                   | 1           |       |       | 1                                                                                           |      |       |
|                            |                               |      |       | Yes                  | 6.57        | 5.45  | 0.228 | -2.72                                                                                       | 1.31 | 0.039 |
| Previous DVT               | 1.63                          | 1.73 | 0.345 | No                   | 1           |       |       | 1                                                                                           |      |       |
|                            |                               |      |       | Yes                  | 1.31        | 3.67  | 0.722 | 0.37                                                                                        | 0.92 | 0.687 |
| Previous PE                | -2.92                         | 3.31 | 0.379 | No                   | 1           |       |       | 1                                                                                           |      |       |
|                            |                               |      |       | Yes                  | -2.78       | 7.3   | 0.703 | 2.67                                                                                        | 1.68 | 0.113 |
| Obesity<br>(BMI > 35kg/m2) | -0.83                         | 3.54 | 0.815 | No                   | 1           |       |       | 1                                                                                           |      |       |
|                            |                               |      |       | Yes                  | -19.74      | 7     | 0.005 | 1.54                                                                                        | 1.79 | 0.389 |
| Acute Infection            | 7.6                           | 2.49 | 0.002 | No                   | 1           |       |       | 1                                                                                           |      |       |
|                            |                               |      |       | Yes                  | 9.67        | 4.7   | 0.04  | -2.74                                                                                       | 1.28 | 0.033 |
| Bedridden                  | 5.13                          | 1.82 | 0.005 | No                   | 1           |       |       | 1                                                                                           |      |       |
|                            |                               |      |       | Yes                  | 9.91        | 3.54  | 0.005 | -1.53                                                                                       | 0.96 | 0.111 |
| Central venous<br>catheter | 0.67                          | 1    | 0.501 | No                   | 1           |       |       | 1                                                                                           |      |       |
|                            |                               |      |       | Yes                  | -4.98       | 2.53  | 0.05  | 1.14                                                                                        | 0.66 | 0.086 |
| Symptomatic VTE            | 1.19                          | 0.63 | 0.059 | No                   | 1           |       |       | 1                                                                                           |      |       |
|                            |                               |      |       | Yes                  | -6.74       | 2.86  | 0.019 | 1.47                                                                                        | 0.73 | 0.045 |
| Superficial VTE            | 2.15                          | 0.33 | <.001 | No                   | 1           |       |       | 1                                                                                           |      |       |
|                            |                               |      |       | Yes                  | 1.97        | 5.48  | 0.72  | 1.39                                                                                        | 1.29 | 0.285 |
| Deep VTE                   | 2.79                          | 0.6  | <.001 | No                   | 1           |       |       | 1                                                                                           |      |       |
|                            |                               |      |       | Yes                  | -0.43       | 2.74  | 0.875 | -0.75                                                                                       | 0.71 | 0.291 |
| Bilateral VTE              | 2.29                          | 0.33 | <.001 | No                   | 1           |       |       | 1                                                                                           |      |       |
|                            |                               |      |       | Yes                  | -4.66       | 5.38  | 0.387 | -1.03                                                                                       | 1.5  | 0.493 |
| Pulmonary embolism         | 2.06                          | 0.39 | <.001 | No                   | 1           |       |       | 1                                                                                           |      |       |
|                            |                               |      |       | Yes                  | -2.08       | 2.63  | 0.43  | 0.61                                                                                        | 0.69 | 0.376 |
| CVC-related<br>thrombosis  | 2.33                          | 0.33 | <.001 | No                   | 1           |       |       | 1                                                                                           |      |       |
|                            |                               |      |       | Yes                  | 11.02       | 4.48  | 0.014 | -0.96                                                                                       | 1.24 | 0.439 |

\*\*\*P.value of the global likelihood ratio interaction test : 0.044.

\*\*\*\*P.value of the global likelihood ratio interaction test : 0.002.

**Supplementary Table 4: Means (SD) of the MOS SF-36 HRQoL scores at M0, M3, M6 according to cancer, VTE, and individual patient characteristics**

|                                               | M0  |           | M3  |           | M6  |           |
|-----------------------------------------------|-----|-----------|-----|-----------|-----|-----------|
|                                               | N   | Mean (SD) | N   | Mean (SD) | N   | Mean (SD) |
|                                               | 355 |           | 252 |           | 181 |           |
| <b>ECOG</b>                                   |     |           |     |           |     |           |
| ECOG (0,1)                                    | 223 | 47 (20)   | 178 | 51 (21)   | 120 | 55 (22)   |
| ECOG (2,3,4)                                  | 131 | 33 (16)   | 74  | 42 (18)   | 60  | 44 (20)   |
| <b>Dissemination</b>                          |     |           |     |           |     |           |
| Local                                         | 52  | 39 (20)   | 40  | 46 (20)   | 29  | 54 (21)   |
| Regional                                      | 72  | 42 (20)   | 51  | 47 (20)   | 42  | 49 (21)   |
| Metastatic                                    | 181 | 43 (20)   | 127 | 48 (20)   | 81  | 50 (23)   |
| <b>Histology</b>                              |     |           |     |           |     |           |
| Adenocarcinoma                                | 223 | 42 (20)   | 156 | 48 (20)   | 109 | 51 (23)   |
| Squamous                                      | 18  | 36 (23)   | 15  | 48 (22)   | 9   | 43 (24)   |
| Neuroendocrine                                | 5   | 32 (7)    | 4   | 27 (10)   | 2   | 64 (20)   |
| Sarcoma                                       | 4   | 38 (15)   | 3   | 39 (6)    | 2   | 42 (1)    |
| Other                                         | 100 | 42 (20)   | 72  | 51 (20)   | 57  | 54 (20)   |
| <b>Cancer surgery &lt;1 month</b>             |     |           |     |           |     |           |
| Yes                                           | 36  | 41 (23)   | 27  | 55 (19)   | 16  | 51 (24)   |
| No                                            | 317 | 42 (19)   | 225 | 47 (20)   | 164 | 51 (21)   |
| <b>Tyrosine Kinases</b>                       |     |           |     |           |     |           |
| Yes                                           | 8   | 53 (25)   | 6   | 38 (30)   | 3   | 56 (24)   |
| No                                            | 345 | 42 (20)   | 246 | 48 (20)   | 177 | 51 (22)   |
| <b>Chemotherapy</b>                           |     |           |     |           |     |           |
| Yes                                           | 237 | 41 (19)   | 163 | 48 (19)   | 107 | 52 (21)   |
| No                                            | 116 | 43 (21)   | 89  | 49 (22)   | 73  | 49 (23)   |
| <b>Anti-angiogenics</b>                       |     |           |     |           |     |           |
| Yes                                           | 19  | 51 (19)   | 16  | 59 (19)   | 12  | 47 (21)   |
| No                                            | 334 | 41 (20)   | 236 | 47 (20)   | 168 | 51 (22)   |
| <b>Previous DVT</b>                           |     |           |     |           |     |           |
| Yes                                           | 45  | 45 (17)   | 34  | 49 (20)   | 28  | 52 (23)   |
| No                                            | 296 | 42 (20)   | 209 | 48 (20)   | 145 | 51 (22)   |
| <b>Previous PE</b>                            |     |           |     |           |     |           |
| Yes                                           | 10  | 51 (17)   | 9   | 53 (20)   | 8   | 47 (25)   |
| No                                            | 332 | 42 (20)   | 234 | 48 (20)   | 165 | 52 (22)   |
| <b>Obesity (BMI &gt; 35 kg/m<sup>2</sup>)</b> |     |           |     |           |     |           |
| Yes                                           | 11  | 49 (29)   | 9   | 55 (27)   | 6   | 61 (27)   |
| No                                            | 335 | 42 (19)   | 237 | 48 (20)   | 169 | 51 (22)   |
| <b>Acute Infection</b>                        |     |           |     |           |     |           |
| Yes                                           | 27  | 34 (17)   | 17  | 42 (18)   | 12  | 57 (21)   |
| No                                            | 312 | 43 (20)   | 223 | 49 (20)   | 159 | 51 (22)   |
| <b>Bedridden</b>                              |     |           |     |           |     |           |
| Yes                                           | 51  | 31 (19)   | 30  | 46 (24)   | 23  | 46 (23)   |
| No                                            | 286 | 44 (19)   | 210 | 49 (20)   | 145 | 53 (22)   |
| <b>Central venous catheter</b>                |     |           |     |           |     |           |
| Yes                                           | 202 | 44 (20)   | 142 | 50 (20)   | 97  | 52 (22)   |
| No                                            | 142 | 40 (20)   | 101 | 46 (21)   | 75  | 50 (21)   |
| <b>Symptomatic VTE</b>                        |     |           |     |           |     |           |
| Yes                                           | 266 | 40 (20)   | 184 | 48 (20)   | 135 | 53 (22)   |
| No                                            | 87  | 48 (20)   | 66  | 47 (22)   | 44  | 48 (21)   |
| <b>Superficial VTE</b>                        |     |           |     |           |     |           |
| Yes                                           | 19  | 46 (23)   | 13  | 57 (23)   | 13  | 64 (27)   |
| No                                            | 336 | 42 (20)   | 239 | 48 (20)   | 168 | 50 (21)   |
| <b>Deep VTE</b>                               |     |           |     |           |     |           |
| Yes                                           | 253 | 40 (19)   | 180 | 47 (20)   | 130 | 51 (21)   |
| No                                            | 102 | 46 (22)   | 72  | 51 (20)   | 51  | 53 (24)   |
| <b>Bilateral VTE</b>                          |     |           |     |           |     |           |
| Yes                                           | 20  | 34 (16)   | 11  | 41 (20)   | 8   | 38 (24)   |
| No                                            | 335 | 42 (20)   | 241 | 49 (20)   | 173 | 52 (21)   |
| <b>Pulmonary embolism</b>                     |     |           |     |           |     |           |
| Yes                                           | 117 | 43 (21)   | 82  | 49 (21)   | 57  | 51 (23)   |
| No                                            | 238 | 41 (19)   | 170 | 48 (20)   | 124 | 52 (21)   |
| <b>CVC-related thrombosis</b>                 |     |           |     |           |     |           |
| Yes                                           | 29  | 48 (21)   | 22  | 55 (19)   | 11  | 58 (19)   |
| No                                            | 326 | 41 (20)   | 230 | 48 (20)   | 170 | 51 (22)   |

**Supplementary Table 5: Means (SD) of the EORTC QLQ-C30 HRQoL scores at M0, M3, M6 according to cancer, VTE, and individual patient characteristics**

|                                               | M0  |           | M3  |           | M6  |           |
|-----------------------------------------------|-----|-----------|-----|-----------|-----|-----------|
|                                               | N   | Mean (SD) | N   | Mean (SD) | N   | Mean (SD) |
|                                               | 355 |           | 252 |           | 181 |           |
| <b>ECOG</b>                                   |     |           |     |           |     |           |
| ECOG (0,1)                                    | 221 | 53 (23)   | 177 | 57 (23)   | 119 | 64 (23)   |
| ECOG (2,3,4)                                  | 130 | 36 (22)   | 73  | 53 (23)   | 58  | 54 (24)   |
| <b>Dissemination</b>                          |     |           |     |           |     |           |
| Local                                         | 52  | 45 (23)   | 39  | 56 (25)   | 29  | 64 (20)   |
| Regional                                      | 70  | 47 (25)   | 50  | 57 (20)   | 41  | 60 (24)   |
| Metastatic                                    | 180 | 47 (24)   | 127 | 56 (24)   | 80  | 57 (25)   |
| <b>Histology</b>                              |     |           |     |           |     |           |
| Adenocarcinoma                                | 221 | 46 (23)   | 155 | 56 (24)   | 106 | 59 (24)   |
| Squamous                                      | 18  | 44 (23)   | 15  | 53 (20)   | 9   | 47 (23)   |
| Neuroendocrine                                | 5   | 35 (12)   | 4   | 29 (14)   | 2   | 67 (24)   |
| Sarcoma                                       | 4   | 46 (5)    | 3   | 47 (17)   | 2   | 62 (29)   |
| Other                                         | 98  | 49 (27)   | 71  | 59 (21)   | 57  | 66 (23)   |
| <b>Cancer surgery &lt;1 month</b>             |     |           |     |           |     |           |
| Yes                                           | 36  | 47 (23)   | 27  | 67 (18)   | 16  | 58 (20)   |
| No                                            | 313 | 46 (24)   | 223 | 55 (23)   | 161 | 61 (24)   |
| <b>Tyrosine Kinases</b>                       |     |           |     |           |     |           |
| Yes                                           | 8   | 42 (30)   | 6   | 50 (33)   | 3   | 83 (29)   |
| No                                            | 341 | 47 (24)   | 244 | 56 (23)   | 174 | 60 (24)   |
| <b>Chemotherapy</b>                           |     |           |     |           |     |           |
| Yes                                           | 233 | 46 (23)   | 161 | 55 (23)   | 105 | 62 (24)   |
| No                                            | 116 | 47 (25)   | 89  | 59 (22)   | 72  | 58 (23)   |
| <b>Anti-angiogenics</b>                       |     |           |     |           |     |           |
| Yes                                           | 19  | 53 (22)   | 16  | 53 (20)   | 12  | 48 (25)   |
| No                                            | 330 | 46 (24)   | 234 | 56 (23)   | 165 | 61 (23)   |
| <b>Previous DVT</b>                           |     |           |     |           |     |           |
| Yes                                           | 45  | 46 (23)   | 34  | 55 (24)   | 28  | 58 (24)   |
| No                                            | 292 | 47 (24)   | 207 | 56 (23)   | 142 | 62 (24)   |
| <b>Previous PE</b>                            |     |           |     |           |     |           |
| Yes                                           | 10  | 52 (25)   | 9   | 45 (20)   | 8   | 52 (15)   |
| No                                            | 328 | 47 (24)   | 232 | 57 (23)   | 162 | 62 (24)   |
| <b>Obesity (BMI &gt; 35 kg/m<sup>2</sup>)</b> |     |           |     |           |     |           |
| Yes                                           | 11  | 67 (23)   | 9   | 69 (22)   | 6   | 75 (29)   |
| No                                            | 331 | 46 (24)   | 235 | 56 (23)   | 166 | 60 (24)   |
| <b>Acute Infection</b>                        |     |           |     |           |     |           |
| Yes                                           | 26  | 37 (19)   | 16  | 60 (22)   | 12  | 64 (22)   |
| No                                            | 309 | 48 (24)   | 222 | 56 (23)   | 156 | 61 (24)   |
| <b>Bedridden</b>                              |     |           |     |           |     |           |
| Yes                                           | 50  | 37 (24)   | 30  | 56 (23)   | 23  | 55 (27)   |
| No                                            | 284 | 48 (24)   | 208 | 56 (23)   | 145 | 62 (23)   |
| <b>Central venous catheter</b>                |     |           |     |           |     |           |
| Yes                                           | 198 | 49 (23)   | 141 | 56 (22)   | 96  | 61 (23)   |
| No                                            | 142 | 44 (25)   | 100 | 56 (23)   | 73  | 61 (25)   |
| <b>Symptomatic VTE</b>                        |     |           |     |           |     |           |
| Yes                                           | 262 | 45 (25)   | 183 | 56 (23)   | 132 | 62 (24)   |
| No                                            | 87  | 52 (21)   | 65  | 57 (24)   | 44  | 59 (22)   |
| <b>Superficial VTE</b>                        |     |           |     |           |     |           |
| Yes                                           | 19  | 49 (27)   | 13  | 63 (24)   | 13  | 72 (22)   |
| No                                            | 332 | 47 (24)   | 237 | 56 (23)   | 165 | 60 (24)   |
| <b>Deep VTE</b>                               |     |           |     |           |     |           |
| Yes                                           | 249 | 47 (23)   | 178 | 55 (23)   | 129 | 59 (24)   |
| No                                            | 102 | 47 (26)   | 72  | 59 (23)   | 49  | 65 (22)   |
| <b>Bilateral VTE</b>                          |     |           |     |           |     |           |
| Yes                                           | 20  | 42 (19)   | 11  | 46 (25)   | 8   | 50 (27)   |
| No                                            | 331 | 47 (24)   | 239 | 57 (23)   | 170 | 61 (24)   |
| <b>Pulmonary embolism</b>                     |     |           |     |           |     |           |
| Yes                                           | 116 | 45 (26)   | 82  | 57 (23)   | 55  | 62 (19)   |
| No                                            | 235 | 48 (23)   | 168 | 56 (23)   | 123 | 60 (26)   |
| <b>CVC-related thrombosis</b>                 |     |           |     |           |     |           |
| Yes                                           | 29  | 57 (18)   | 22  | 63 (20)   | 11  | 67 (21)   |
| No                                            | 322 | 46 (24)   | 228 | 56 (23)   | 167 | 60 (24)   |
